# Supplementary material
Source: PubMed Central journal article supplement (PMC2777499)
Supplement: 00171.2009_3.pdf [file 00171.2009_3.pdf]

Online Supplement Figure 1: Effect of dose of CDDO and TNF $\alpha$ /IL-1 $\beta$  on IL-8 release from human primary airway epithelia Data from two experiments using different donors indicated that 300nM CDDO exposure significantly decreased IL-8 release from human bronchial epithelial cells at ALI after stimulation with TNF $\alpha$ /IL-1 $\beta$ , and that minimal further decrease was seen at 1000nM drug concentration. \*P<0.05 compared to TNF $\alpha$ /IL-1 $\beta$  only.

Online Supplement Figure 2: Effect of timing of CDDO exposure relative to inflammatory stimulation Combined data from three experiments using different donors showed that preincubation with 300 nM CDDO is more effective in reducing IL-8 release than either co-administration of drug with proinflammatory stimulus or drug administration after stimulation with TNF $\alpha$ /IL-1 $\beta$ . \*P<0.01 compared with stimulation without CDDO.
