# Supplementary material
Source: PubMed Central journal article supplement (PMC2777499)

Figure E1 (online supplement)

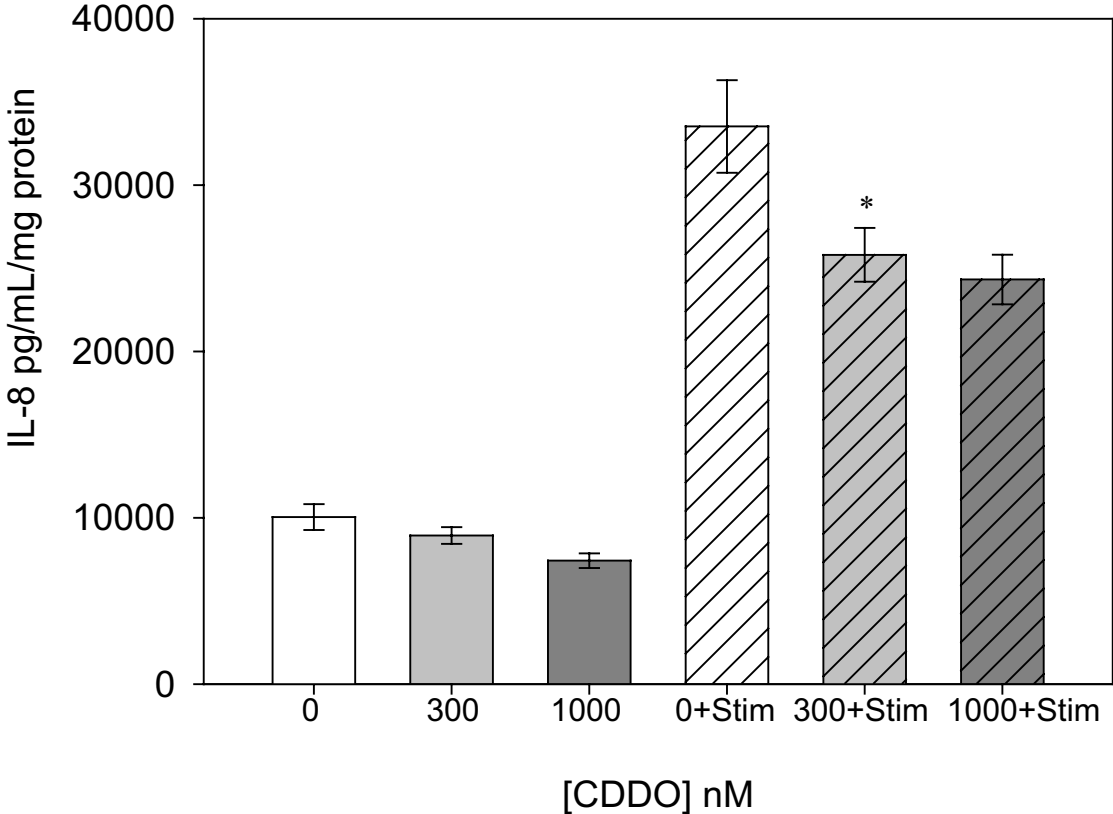

Supplement: 00171.2009_1.pdf [file 00171.2009_1.pdf]

Figure E2 (online supplement)

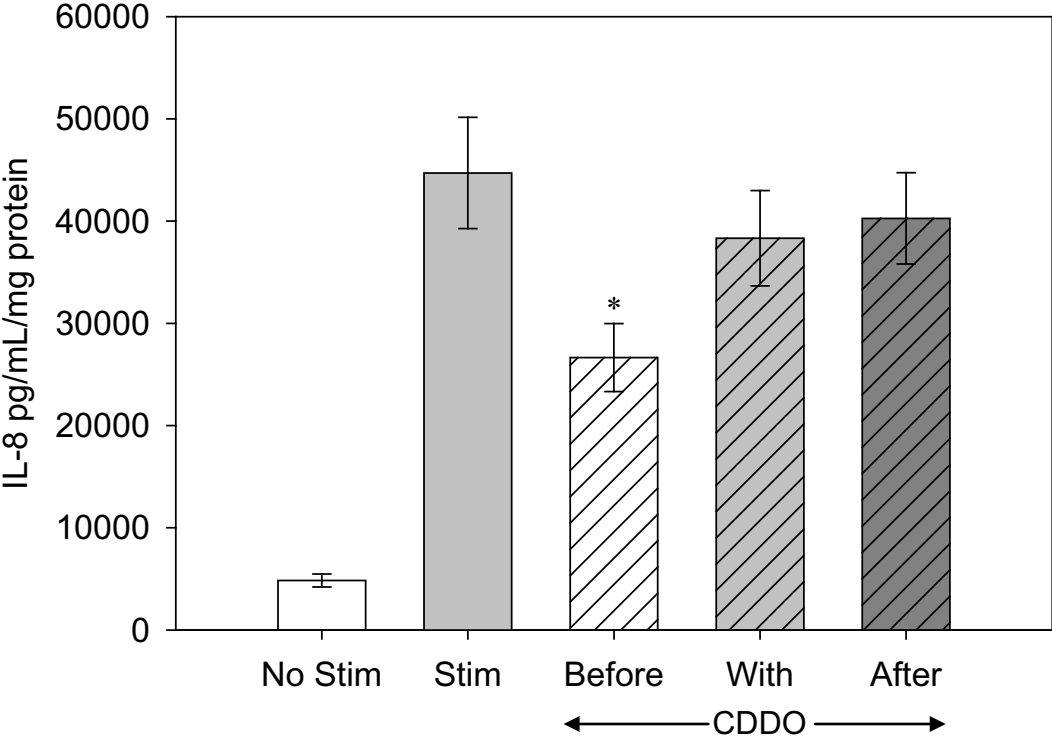

Supplement: 00171.2009_2.pdf [file 00171.2009_2.pdf]
